# Supplementary material for: Malignant cerebral infarction, systemic venous thrombosis and thrombocytopenia after ChAdOx1 nCov vaccination: a possible catastrophic variant of vaccine induced thrombotic thrombocytopenia
Source: Research Square preprint supplement (doi:10.21203/rs.3.rs-448338/v1), 2021-05-03
Supplement: Supplementary file 1 [file 490caedbfaaa6769bad06dff.docx]

**Supplementary Appendix**

This appendix has been provided by the authors to give readers additional information about their work.

Supplementary Appendix to:

**Malignant cerebral infarction, systemic venous thrombosis and thrombocytopenia after ChAdOx1 nCov vaccination: a possible catastrophic variant of vaccine induced thrombotic thrombocytopenia**

M. De Michele1 (MD, PhD), M. Iacobucci2 (MD), E. Nicolini1 (MD), A. Chistolini3 (MD,PhD), F. Pulcinelli4 (MD,PhD), B. Cerbelli5 (MD), E. Merenda6 (MD), O.G. Schiavo7 (MD), E. Sbardella1 (MD), I. Berto7 (MD), L. Petraglia1 (MD), N. Caracciolo7 (MD), M. Chiara (MD)8, S. Truglia9 (MD), D. Toni7 (MD,PhD)

1Emergency Department, Stroke Unit, Sapienza University of Rome, Rome, Italy

2 Neuroradiology Unit, Department of Human Neurosciences, Sapienza University of Rome, Rome, Italy

3Hematology, Department of Translational and Precision Medicine, Sapienza University of Rome, Rome, Italy

4 Department of Experimental Medicine, Sapienza University of Rome, Rome, Italy

5 Department of Medico-Surgical Sciences and Biotechnologies, Sapienza University of Rome, Rome, Italy

6 Department of Radiological, Oncological and Pathological Sciences, Sapienza, University of Rome, Rome, Italy

7 Emergency Department, Stroke Unit and Department of Human Neurosciences, Sapienza University of Rome, Rome, Italy

8 Neurosurgery, Department of Human Neurosciences, Sapienza University of Rome, Rome, Italy

9 Lupus Clinic, Rheumatology Unit, Dipartimento Di Scienze Cliniche Internistiche, Anestesiologiche e Cardiovascolari, Sapienza University of Rome, Rome, Italy

**Table of Contents:**

1. Figure S1 page 3
2. Table S1 page 4

**Figure S1.** **A.** Platelet-rich thrombus massively infiltrated by neutrophils. Morphologic features suggestive of Neutrophil DNA Extracellular Traps are present (insert). **B.** Immunohistochemistry for CD61 highlights the abundant presence of platelets.

**
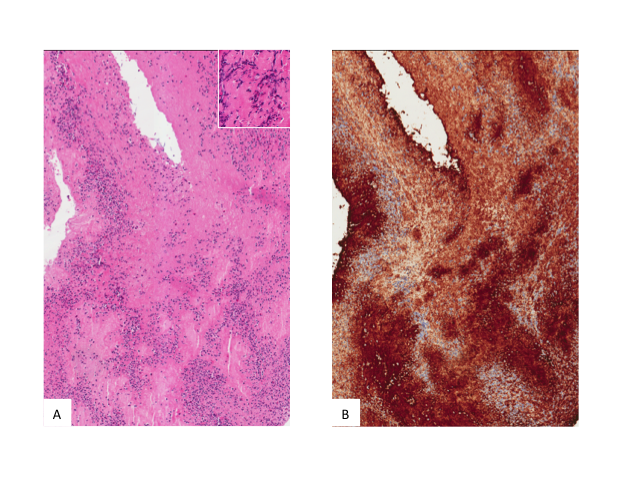
**

**Table S1. Blood examination parameters at baseline, 12 hours, 24 hours and 48 hours in Patient 1 and Patient 2.** NA= Not assessed.

Data from case 1 and 2 are listed for the first 48 hours, severe thrombocytopenia and D-Dimer increase was evident in both patients. From day 6 liver enzymes increased in Patient 1 up to 487 UI/L of aspartate aminotransferase, 640 UI/L of alanine aminotransferase, 163 UI/L of γ­glutamyltransferase and 467 UI/L of lactate dehydrogenase at day 17, this liver disfunction was related to the evidence of portal vein thrombosis

**
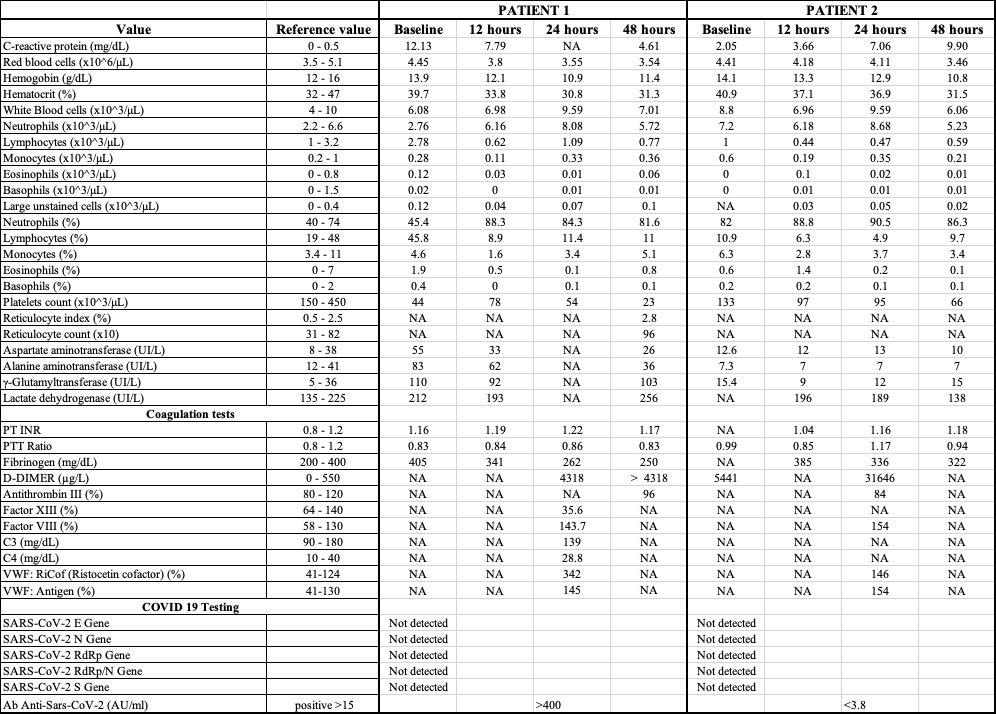
**

.
